# Supplementary material for: Rer1 and calnexin regulate endoplasmic reticulum retention of a peripheral myelin protein 22 mutant that causes type 1A Charcot-Marie-Tooth disease
Source: PubMed Central journal article supplement — Sci Rep. 2014 Nov 11;4:6992. doi: 10.1038/srep06992 (PMC4227013; doi:10.1038/srep06992), 2014-11-11

**Rer1 and calnexin regulate endoplasmic reticulum retention of a peripheral myelin protein 22 mutant that causes type 1A Charcot-Marie-Tooth disease**

Taichi Hara, Yukiko Hashimoto, Tomoko Akuzawa, Rika Hirai, Hisae Kobayashi, and Ken Sato\*

Laboratory of Molecular Traffic, Institute for Molecular and Cellular Regulation, Gunma University, Maebashi, Gunma 371-8512, Japan

\*Corresponding author:

Ken Sato

3-39-15 Showa-machi, Maebashi, Gunma 371-8512, Japan.

Tel: +81-27-220-8840

Fax: +81-27-220-8844

E-mail: sato-ken@gunma-u.ac.jp

Supplementary Information:

Supplementary Figure Legends

Figure S1

Figure S2

Figure S3

Figure S4

Figure S5

Figure S6

Original blots

## Supplementary Figure Legends

### **Figure S1. Subcellular localization of peripheral myelin protein 22 (PMP22)-GFP in HeLa cells stably expressing wild-type or mutant PMP22-GFP.**

A portion of wild-type (WT) PMP22-GFP (GFP, green fluorescent protein) colocalizes with late endosome/lysosome marker protein in HeLa cells. HeLa cells stably expressing WT or mutant PMP22-GFP were immunostained with an anti-Rab7 antibody and observed using confocal laser scanning microscopy. Scale bar, 10  $\mu$ m.

### **Figure S2. Knockdown of *Hrd1* using small interfering RNA (siRNA #1) increases the protein level of mutant PMP22-GFP.**

HeLa cells stably expressing WT or mutant PMP22-GFP were treated with control or *Hrd1* siRNA (*Hrd1* #1) for 3 days. Immunoblots of cell lysates were probed with anti-GFP, anti-*Hrd1*, anti-*gp78*, and anti- $\alpha$ -actin antibodies. Note that *Hrd1* #1 also reduced the protein level of *gp78*, suggesting that this siRNA has an off-target effect on *gp78* to some extent.

### **Figure S3. Effect of *Hrd1*, *gp78*, and *calnexin* knockdown on PMP22 degradation.**

(A, C, E) Pulse-chase experiments of PMP22-GFP in HeLa cells. HeLa cells stably expressing PMP22(WT)-GFP (A), PMP22(L16P)-GFP (C), or PMP22(G150D)-GFP (E) were treated with control siRNA or siRNAs against *Hrd1*, *gp78*, or *calnexin* (*CNX*) for 3 days. To inhibit protein synthesis, we incubated cells in the presence of 10  $\mu$ g/mL cycloheximide (CHX) for the indicated time. The cell lysates were immunoblotted with anti-GFP (top panel) and anti- $\alpha$ -actin (bottom panel) antibodies. (B, D, F) Quantitative analysis of the levels of each PMP22-GFP during pulse-chase experiments. Graphs show the relative level of PMP22(WT)-GFP (B), PMP22(L16P)-GFP (D), and PMP22(G150D)-GFP (F) normalized against  $\alpha$ -actin. Values indicate the mean  $\pm$

standard error of the mean of three independent experiments. Two-way analysis of variance (ANOVA) was used to determine the significance of the differences.  $*P < 0.05$  (ANOVA),  $**P < 0.01$  (ANOVA).

**Figure S4. Effect of *Rer1* knockdown on the ER retention of PMP22(L16P) in COS1 cells.**

(A) Localization of PMP22-GFP derivatives in COS1 cells. COS1 cells stably expressing WT or mutant PMP22-GFP were transfected with control or *Rer1* siRNA for 3 days. Then, cells were fixed and observed using confocal laser scanning microscopy. Scale bar, 20  $\mu\text{m}$ . (B) Immunodetection of PMP22-GFP in COS1 cells. COS1 cells stably expressing WT or mutant PMP22-GFP were treated with control or *Rer1* siRNA for 3 days. Immunoblots of total cell lysates were probed with anti-GFP (top panel), anti-*Rer1* (middle panel), and anti- $\alpha$ -actin antibodies (bottom panel).

**Figure S5. Validation of the phenotype specificity induced by *Rer1* knockdown.**

Overexpression of mouse *Rer1* using a construct that lacked the sequence complementary to the cognate siRNA (*Rer1* #7) rescued the phenotype induced by *Rer1* knockdown. HeLa cells stably expressing PMP22(L16P)-GFP were transfected with monomeric red fluorescent protein (mRFP)-mouse *Rer1* (m*Rer1*) using a retrovirus vector. Cells were treated with control siRNA or siRNA (*Rer1* #7) against *Rer1*. Fixed cells were observed using confocal laser scanning microscopy. Scale bars, 10  $\mu\text{m}$ .

**Figure S6. Localization of PMP22(G150D)-GFP to the ER was superficially unaffected by simultaneous knockdown of *Rer1* and *calnexin*.**

HeLa cells stably expressing PMP22(G150D)-GFP were treated with control or siRNA against *Rer1*, *calnexin*, or both for 3 days. Then, fixed cells were immunostained using an antibody against Lamp1 (a late endosome/lysosome marker) and observed using

confocal laser scanning microscopy. Scale bars, 10  $\mu\text{m}$ .

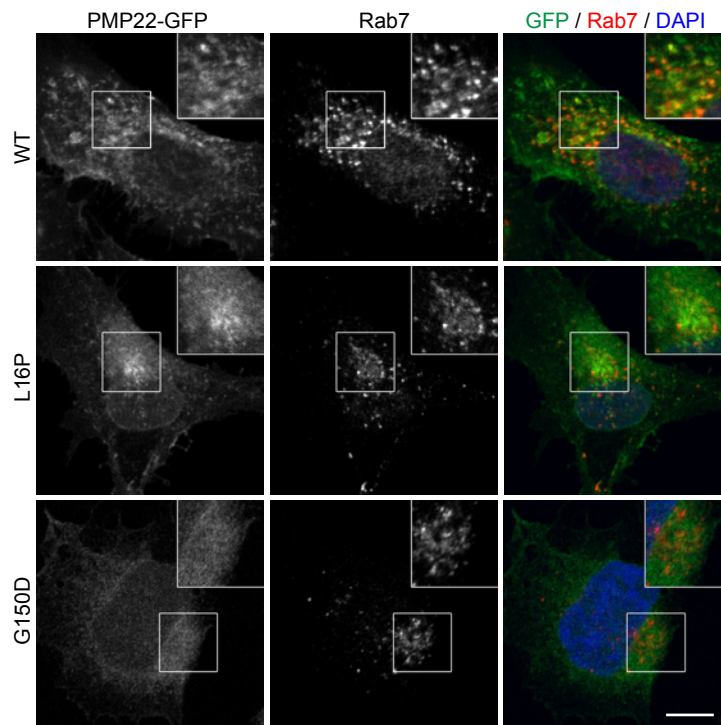

**Figure S1. Subcellular localization of peripheral myelin protein 22 (PMP22)-GFP in HeLa cells stably expressing wild-type or mutant PMP22-GFP.**

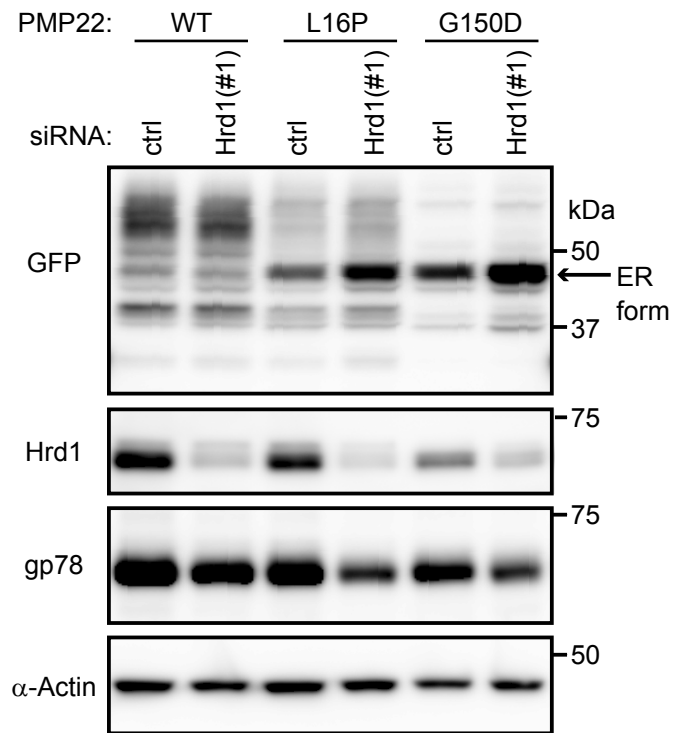

**Figure S2. Knockdown of *Hrd1* using small interfering RNA (siRNA #1) increases the protein level of mutant PMP22-GFP.**

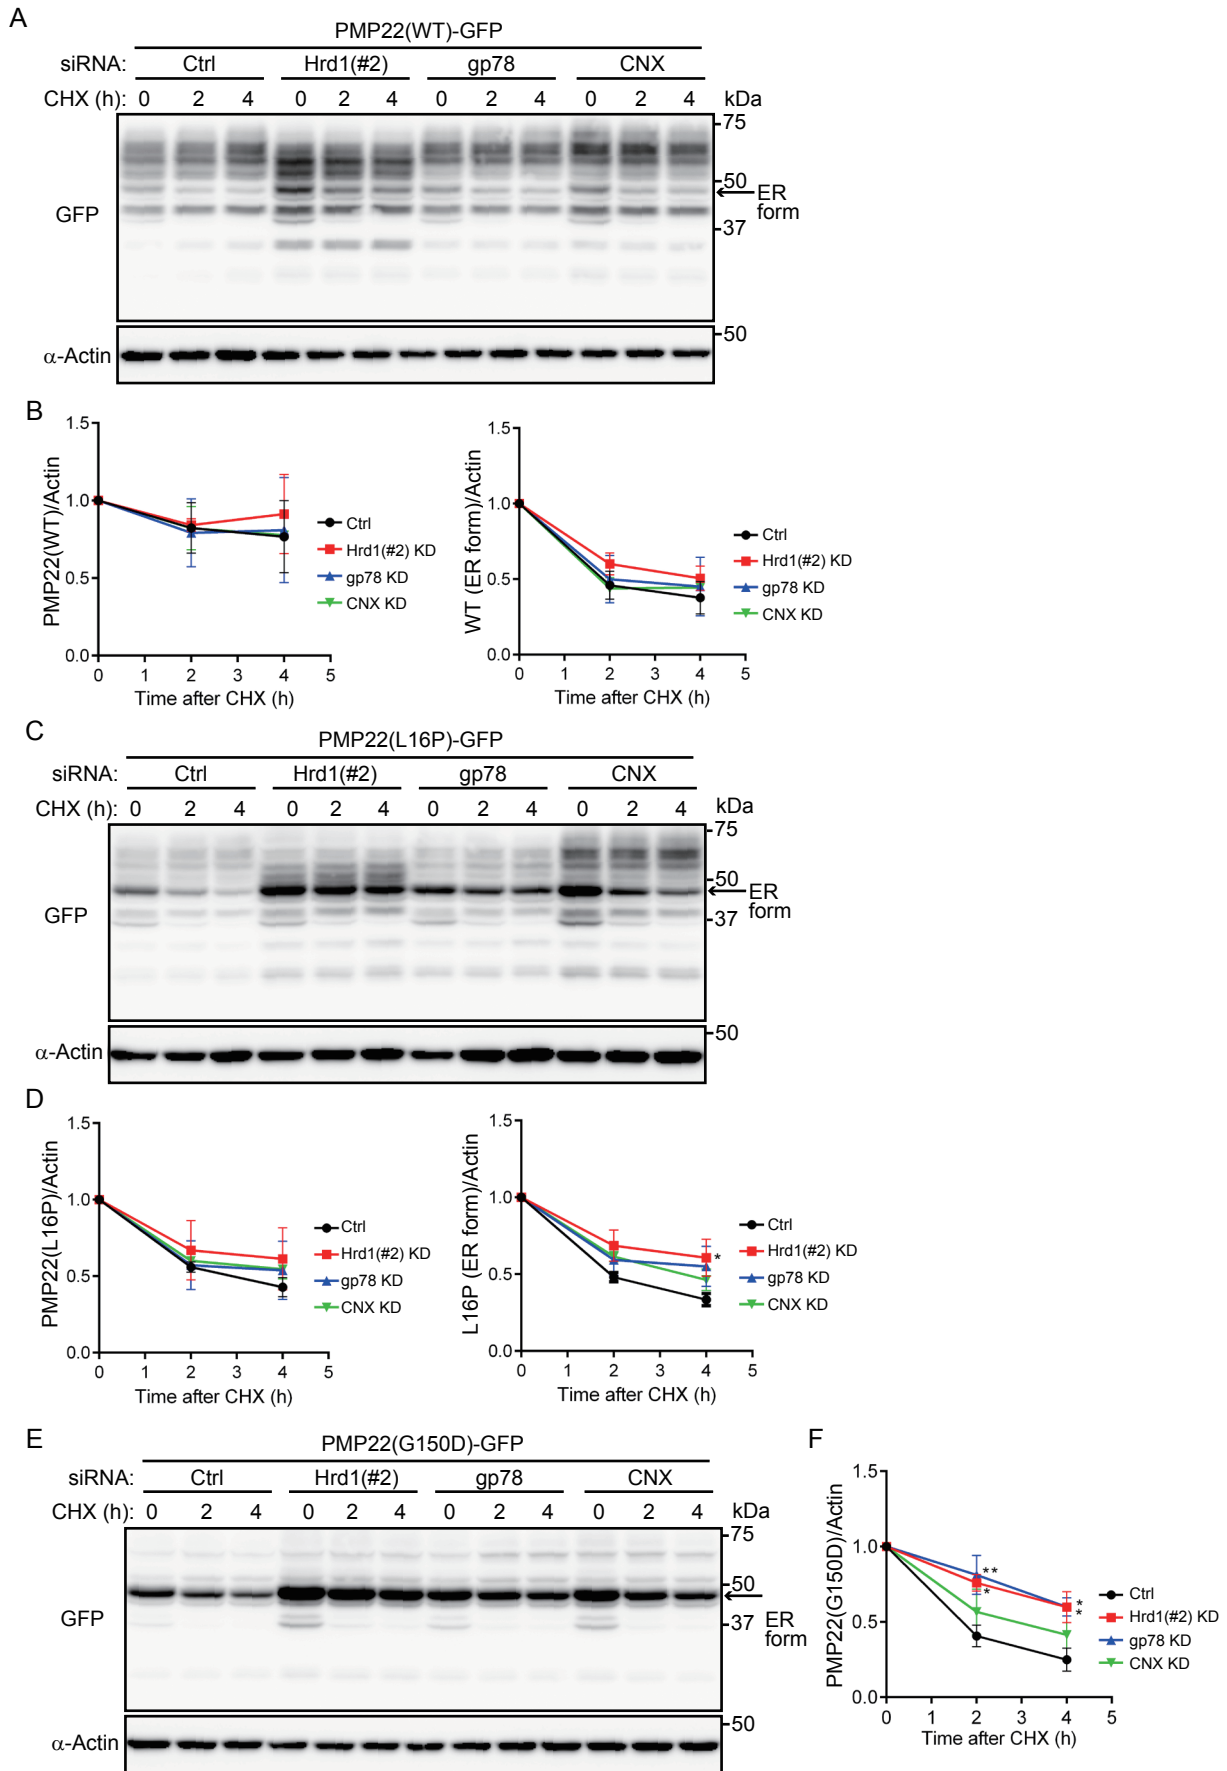

**Figure S3. Effect of *Hrd1*, *gp78*, and *calnexin* knockdown on PMP22 degradation.**

A

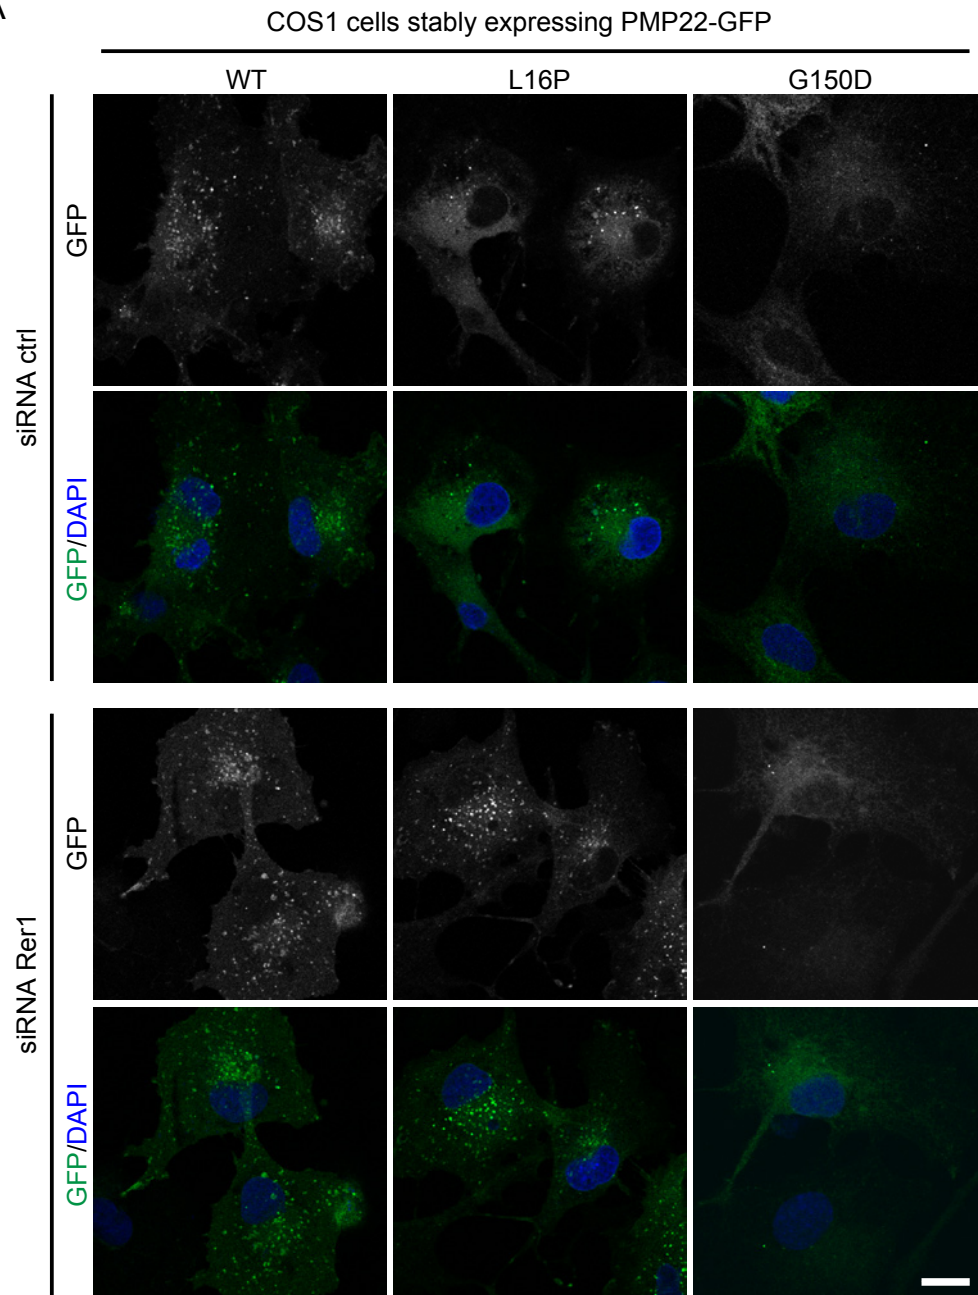

B

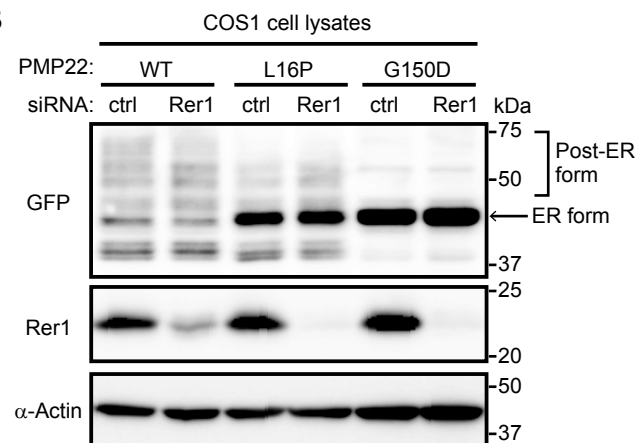

**Figure S4. Effect of *Rer1* knockdown on the ER retention of PMP22(L16P) in COS1 cells.**



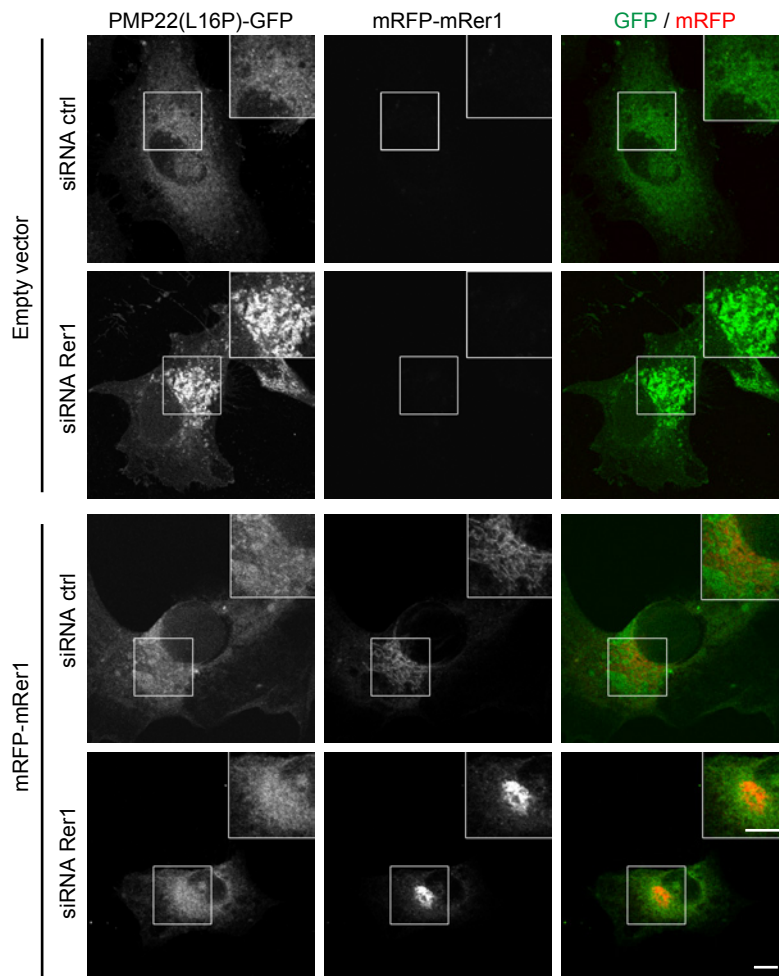

**Figure S5. Validation of the phenotype specificity induced by *Rer1* knockdown.**

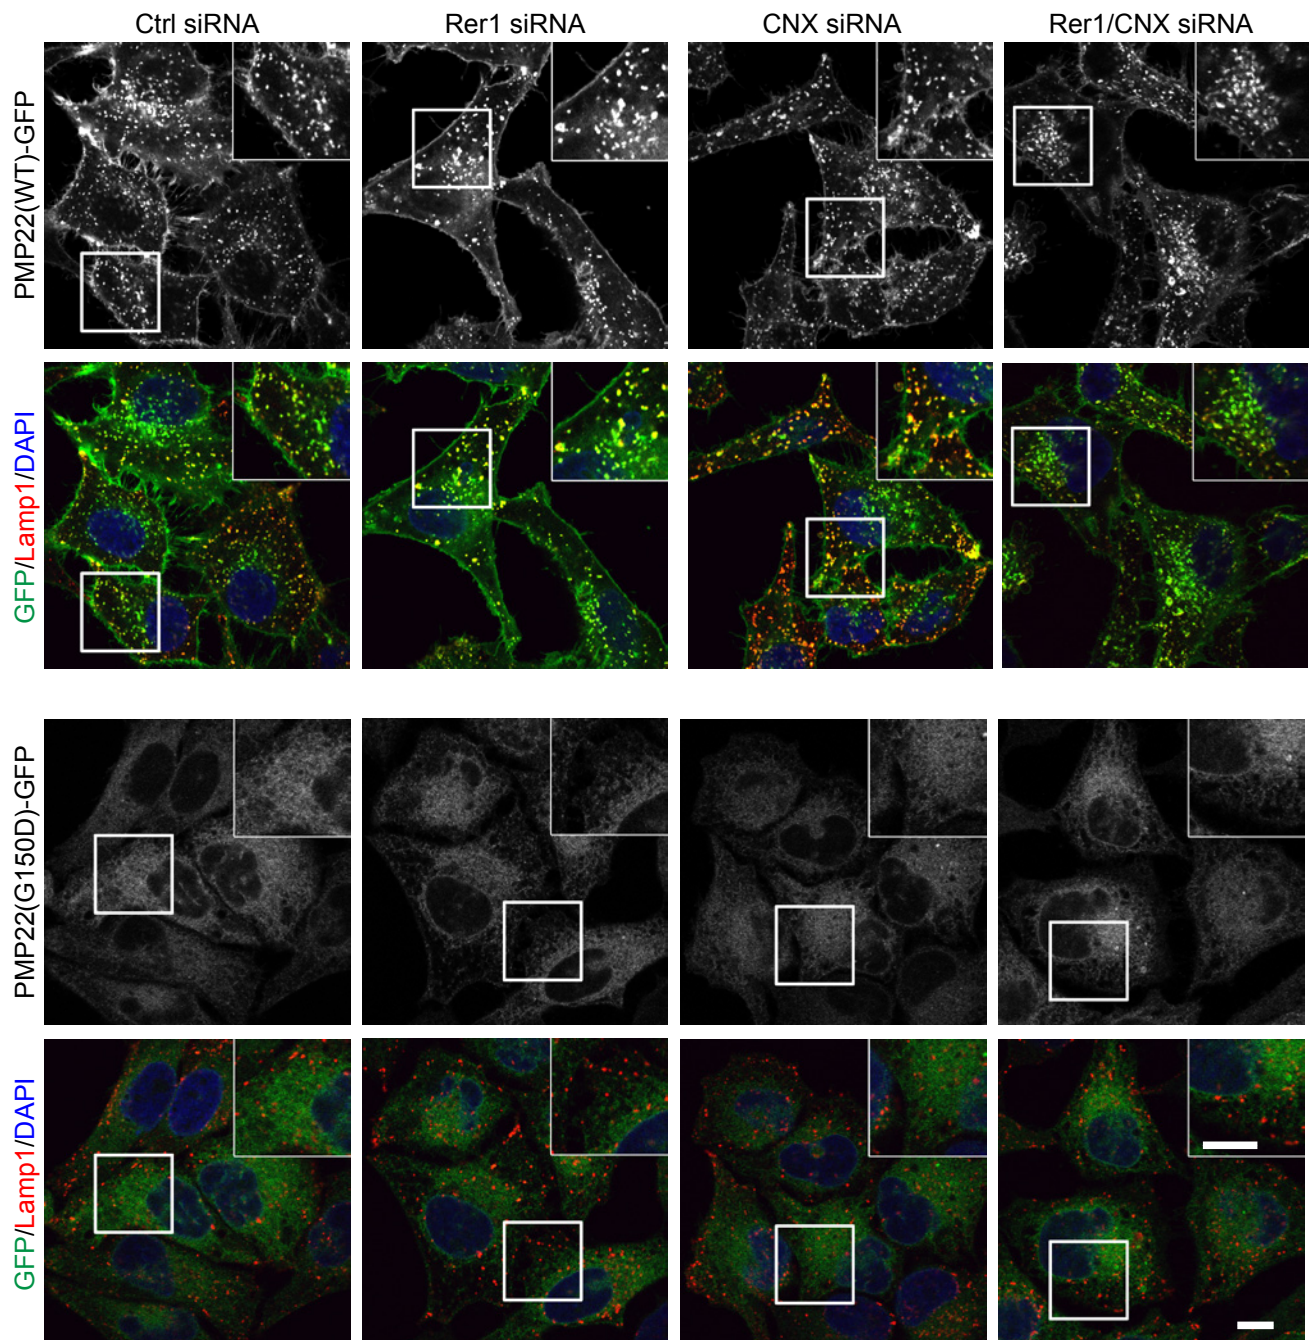

**Figure S6. Localization of PMP22(G150D)-GFP to the ER was superficially unaffected by simultaneous knockdown of *Rer1* and *calnexin*.**

Original gel images of Figure 1

Figure 1C

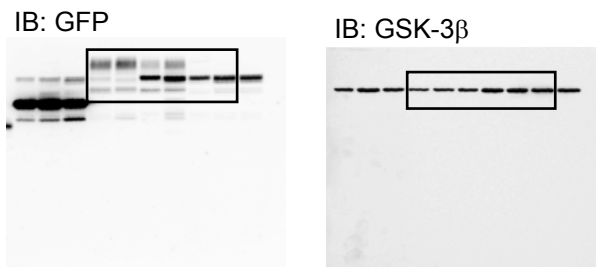

Figure 1D

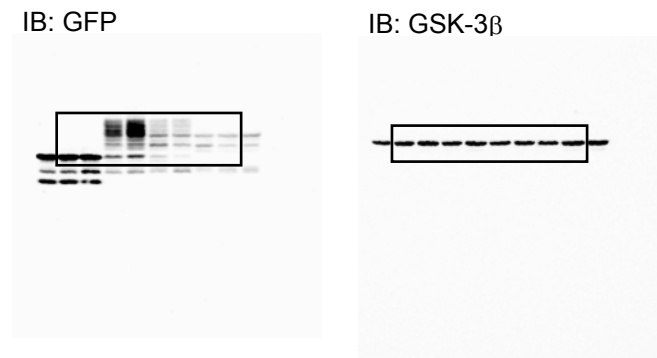

Original gel images of Figure 2

Figure 2A

IB: GFP

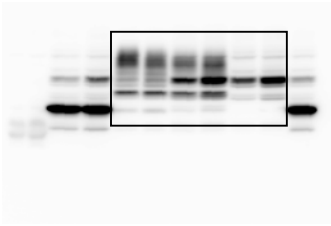

IB:  $\alpha$ -Actin

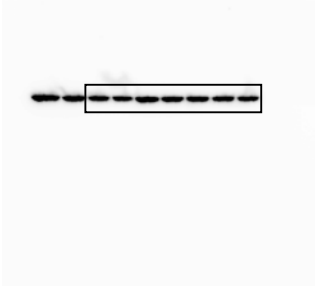

IB: gp78

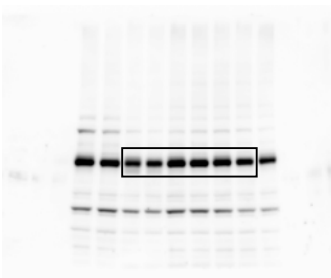

IB: Hrd1

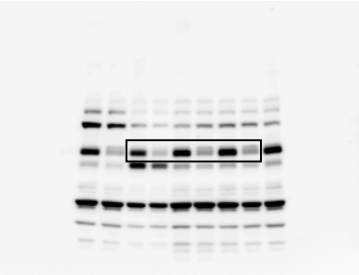

Figure 2B

IB: GFP

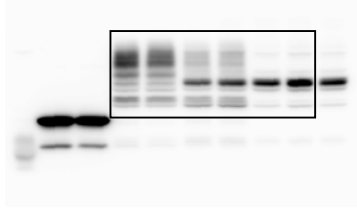

IB:  $\alpha$ -Actin

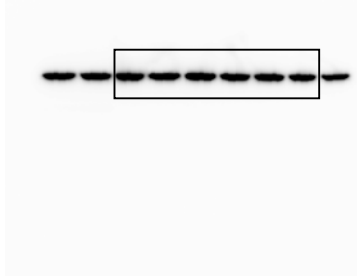

IB: gp78

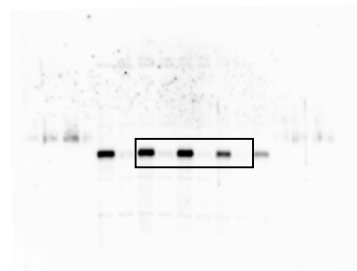

IB: Hrd1

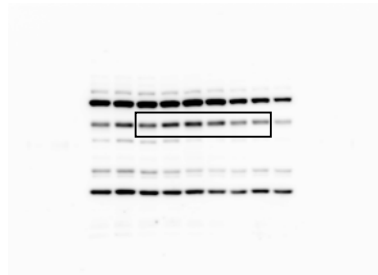

Figure 2E

IB: GFP

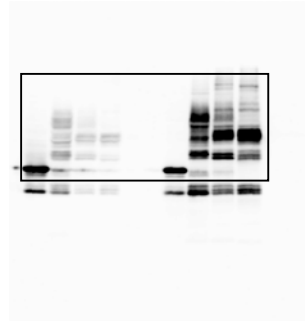

IB: Hrd1

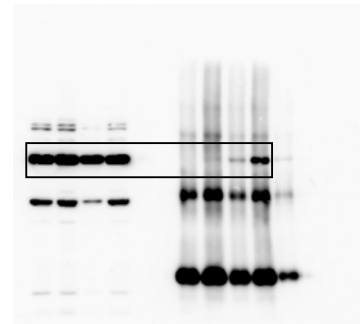

IB: gp78

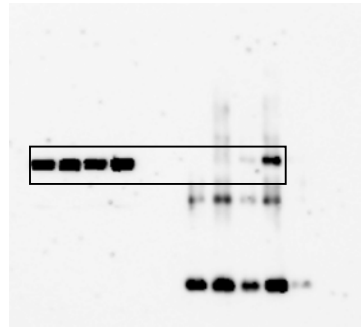

Figure 2F

IB: GFP

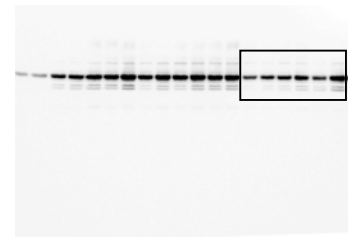

IB:  $\alpha$ -Actin

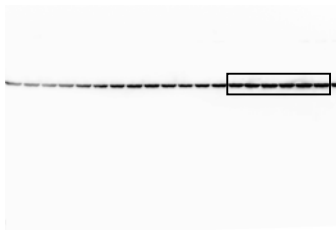

IB: Hrd1

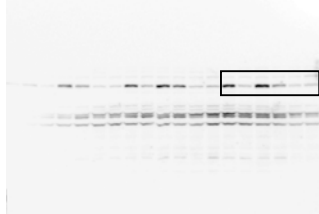

IB: gp78

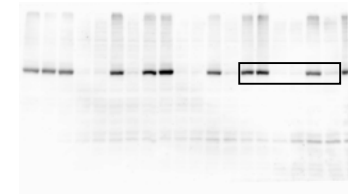

Original gel images of Figure 3

Figure 3A

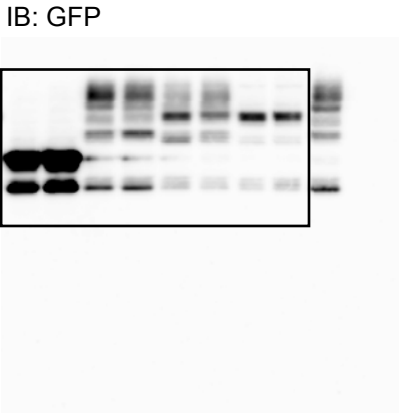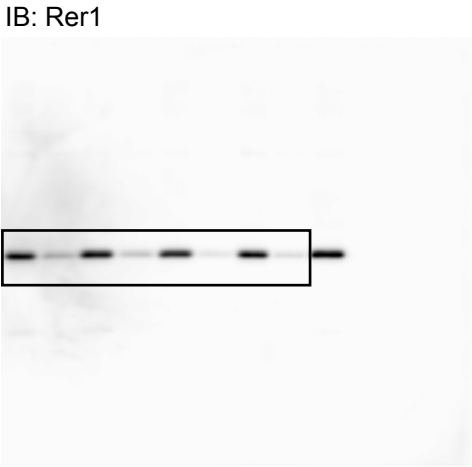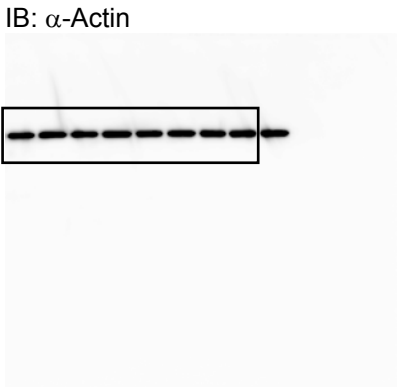

Figure 3B

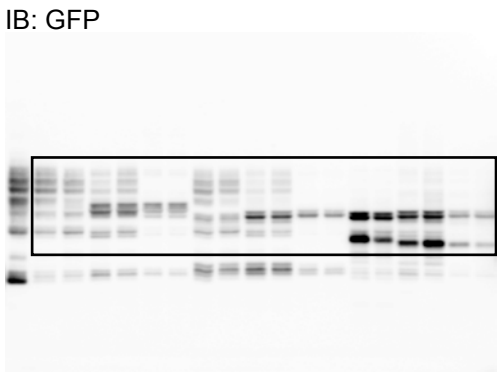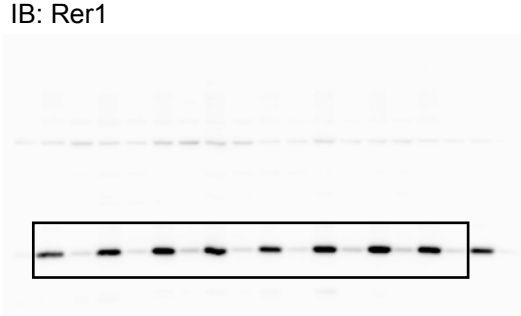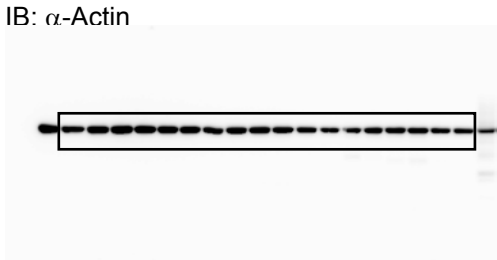

Original gel images of Figure 4

Figure 4A

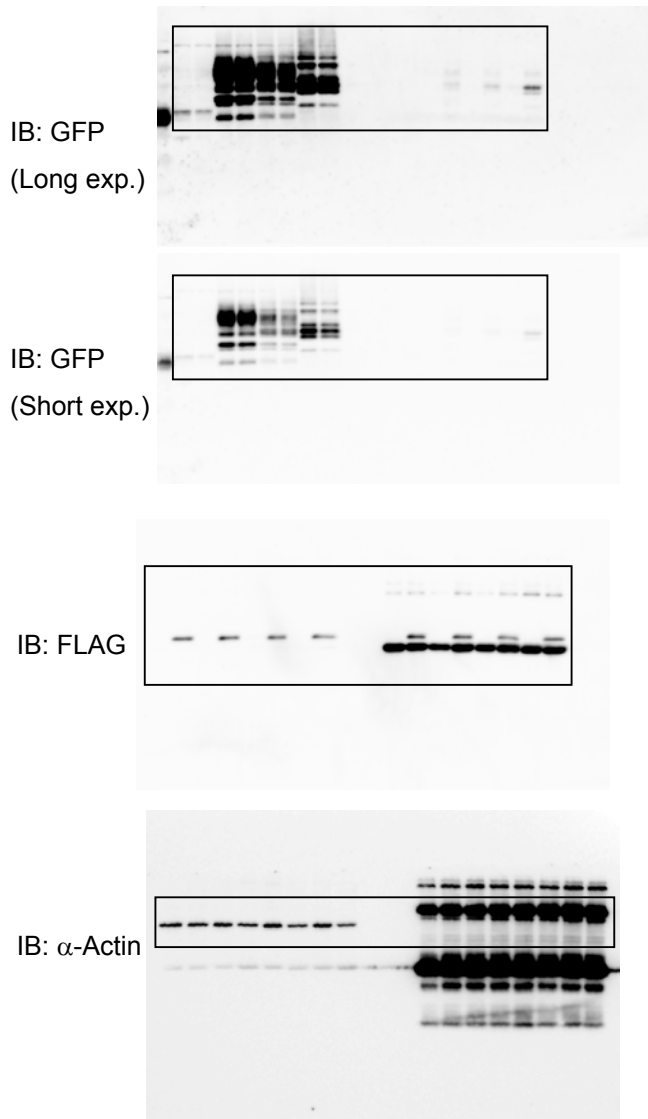

Figure 4B

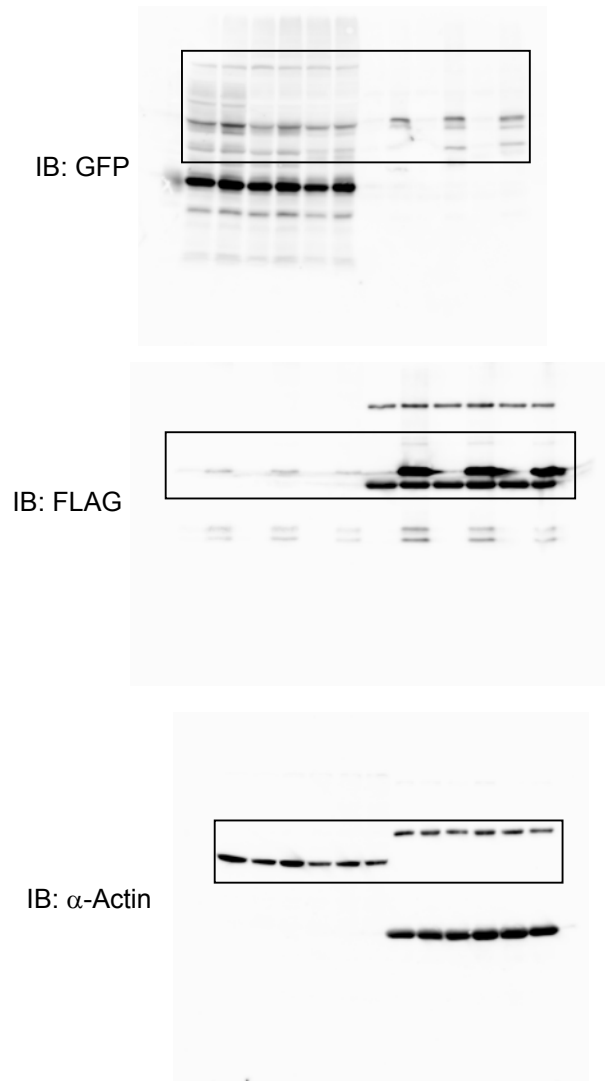

Original gel images of Figure 5

Figure 5A

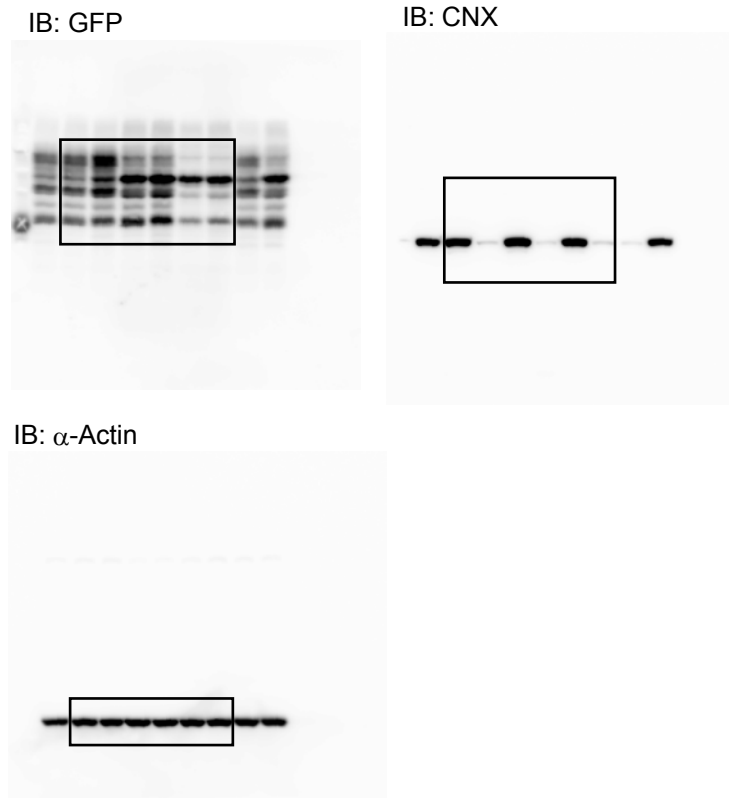

Original gel images of Figure 6

Figure 6A

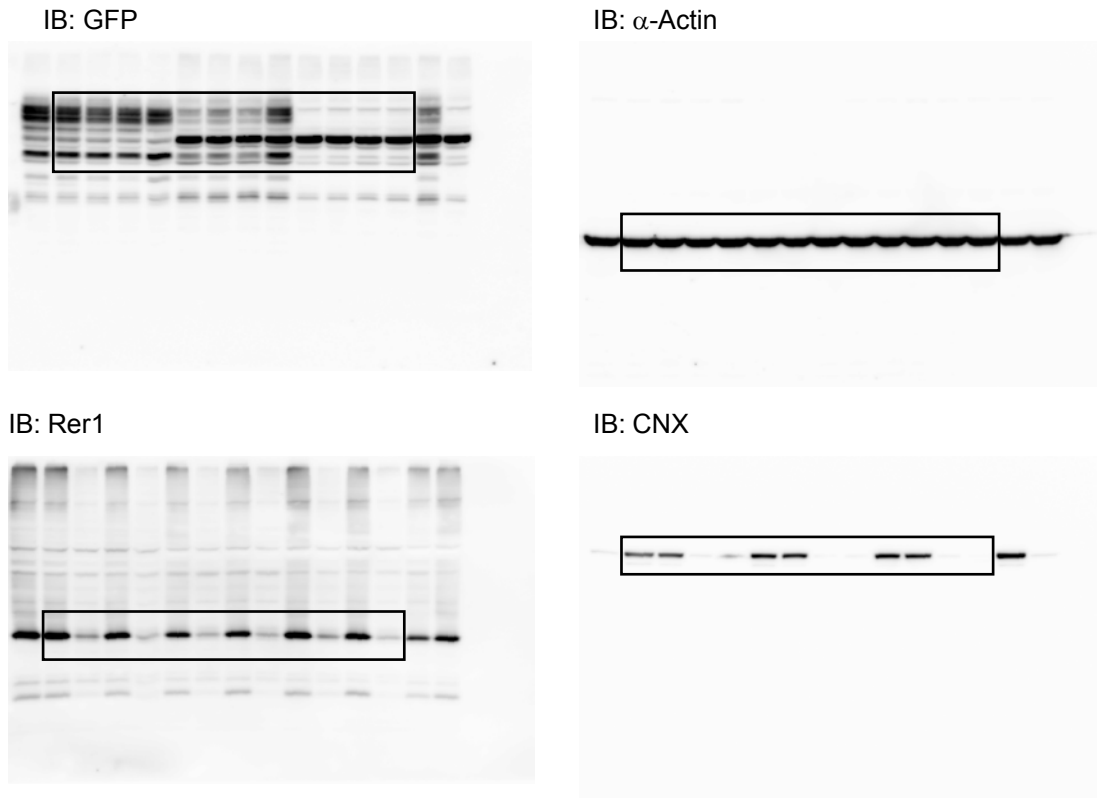

Figure 6C

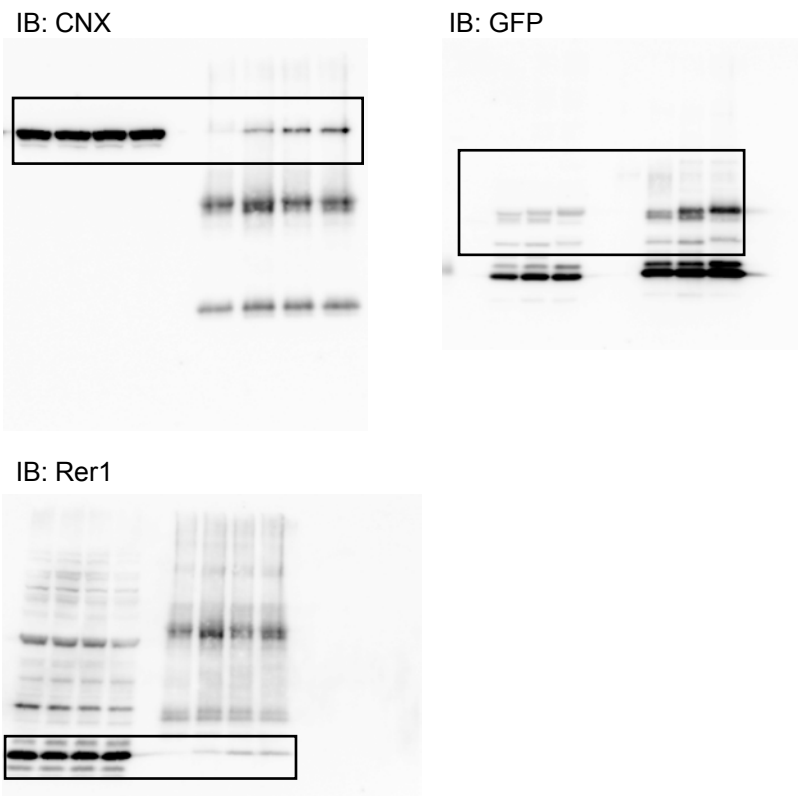

Supplement: srep06992-s1.pdf [file srep06992-s1.pdf]
